# Supplementary material for: New from Old: Thorectandrin Alkaloids in a Southern Australian Marine Sponge, Thorectandra choanoides (CMB-01889)
Source: MDPI journal article supplement (doi:10.3390/md19020097), 2021-02-09
Supplement: s1 [file s1]

## Supporting Information

### **New from old: Thorectandrin alkaloids in a southern Australian marine sponge, *Thorectandra choanoides* (CMB-01889)**

Shamsunnahar Khushi, Angela A. Salim, Ahmed H. Elbanna, Laizuman Nahar,  
Robert J. Capon\*

Institute for Molecular Bioscience, The University of Queensland,  
St. Lucia, QLD 4072, Australia

\*Correspondence: [r.capon@uq.edu.au](mailto:r.capon@uq.edu.au)

## List of Figures

|                                                                                                                                                                               |    |
|-------------------------------------------------------------------------------------------------------------------------------------------------------------------------------|----|
| <b>Figure S1.</b> A portion of the GNPS molecular networks for 960 marine n-BuOH extracts and 95 authentic standards from different classes of marine natural compounds. .... | 3  |
| <b>Figure S2.</b> GNPS molecular cluster uniquely associated with <i>Thorectandra choanoides</i> (CMB-01889).....                                                             | 4  |
| <b>Figure S3.</b> Fractionation scheme for <i>Thorectandra choanoides</i> (CMB-01889).....                                                                                    | 5  |
| <b>Figure S4.</b> Analytical HPLC chromatogram of CMB-01889 n-BuOH soluble fraction (inset-UV spectrum of <b>1</b> ).....                                                     | 5  |
| <b>Figure S5.</b> <sup>1</sup> H NMR (600 MHz, methanol-d <sub>4</sub> ) spectrum of thorectandrin A ( <b>1</b> ).....                                                        | 6  |
| <b>Figure S6.</b> <sup>13</sup> C NMR (150 MHz, methanol-d <sub>4</sub> ) spectrum of thorectandrin A ( <b>1</b> ).....                                                       | 6  |
| <b>Figure S7.</b> HSQC (600 MHz, methanol-d <sub>4</sub> ) spectrum of thorectandrin A ( <b>1</b> ).....                                                                      | 7  |
| <b>Figure S8.</b> HMBC (600 MHz, methanol-d <sub>4</sub> ) spectrum of thorectandrin A ( <b>1</b> ).....                                                                      | 7  |
| <b>Figure S9.</b> COSY (600 MHz, methanol-d <sub>4</sub> ) spectrum of thorectandrin A ( <b>1</b> ).....                                                                      | 8  |
| <b>Figure S10.</b> ROESY (600 MHz, methanol-d <sub>4</sub> ) spectrum of thorectandrin A ( <b>1</b> ) .....                                                                   | 8  |
| <b>Figure S11.</b> HRESIMS data for thorectandrin A ( <b>1</b> ) .....                                                                                                        | 9  |
| <b>Figure S12.</b> ECD (top) and UV (bottom) spectra of thorectandrin A ( <b>1</b> ).....                                                                                     | 9  |
| <b>Figure S13.</b> Antibacterial and antifungal assay results for thorectandrin A ( <b>1</b> ).....                                                                           | 11 |
| <b>Figure S14.</b> Cytotoxicity assay results for thorectandrin A ( <b>1</b> ).....                                                                                           | 11 |

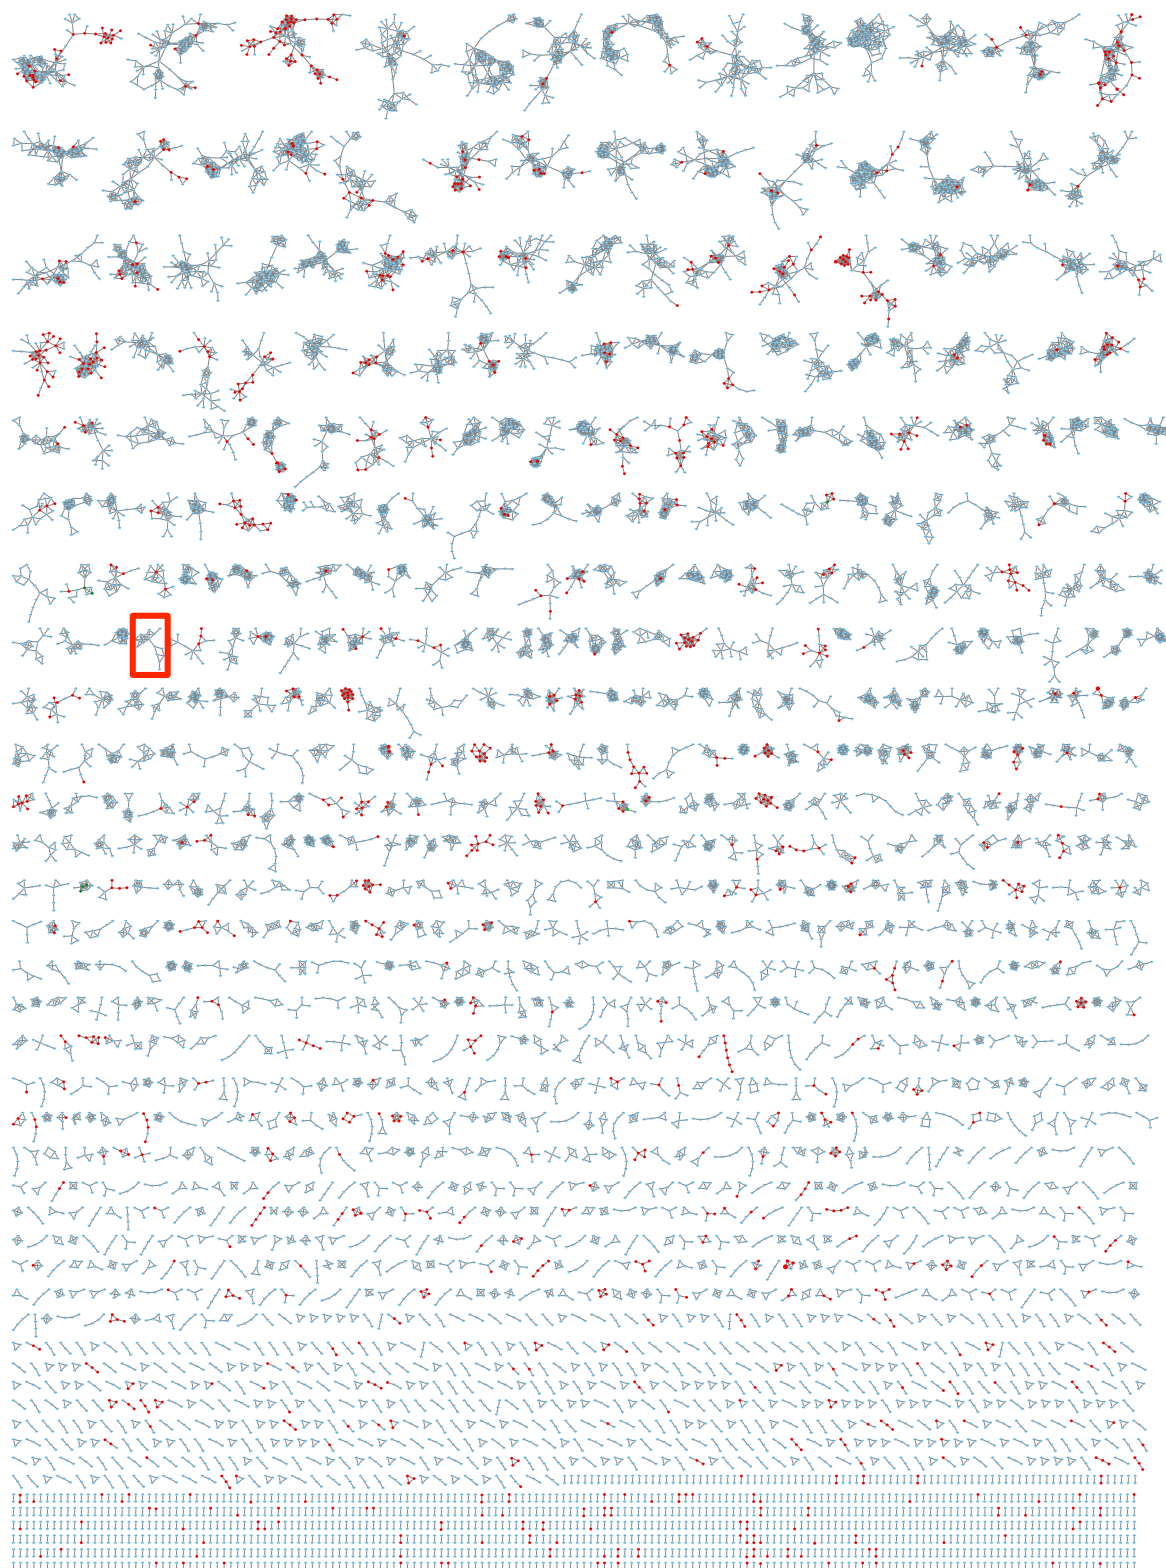

**Figure S1.** A portion of the GNPS molecular networks for 960 marine *n*-BuOH extracts and 95 authentic standards from different classes of marine natural compounds (red nodes represent known compounds). Red box: thorectandrins cluster (see Figure 2 for expansion).

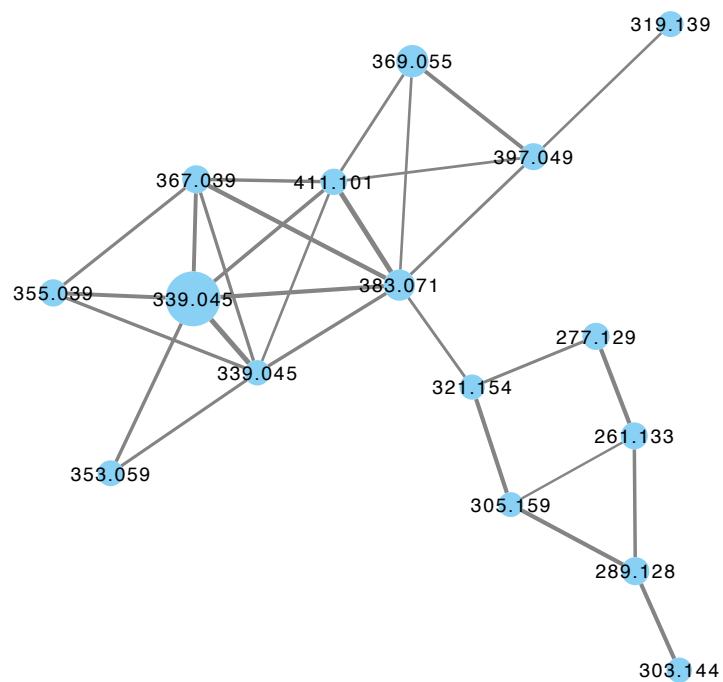

**Figure S2.** GNPS molecular cluster uniquely associated with *Thorectandra choanoides* (CMB-01889). Numbers on nodes correspond to m/z values.

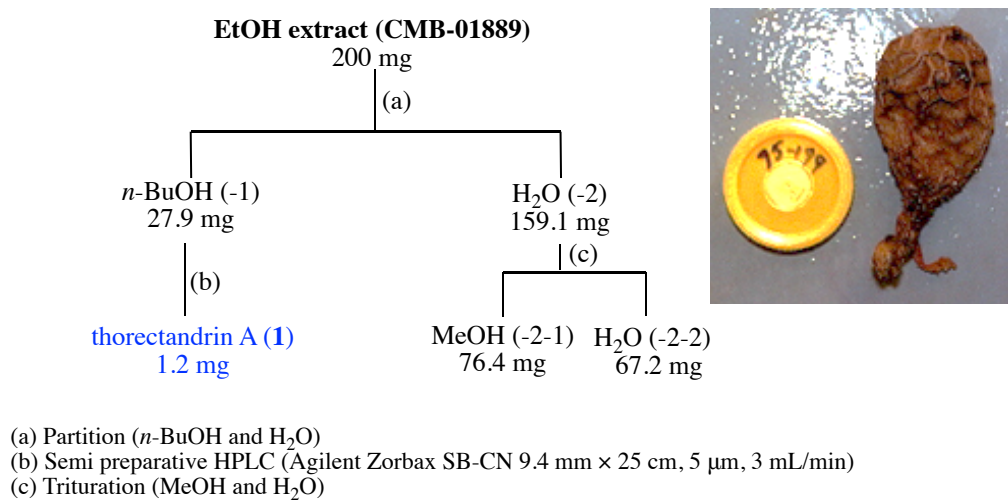

**Figure S3.** Fractionation scheme for *Thorectandra choanoides* (CMB-01889), inset: sponge picture.

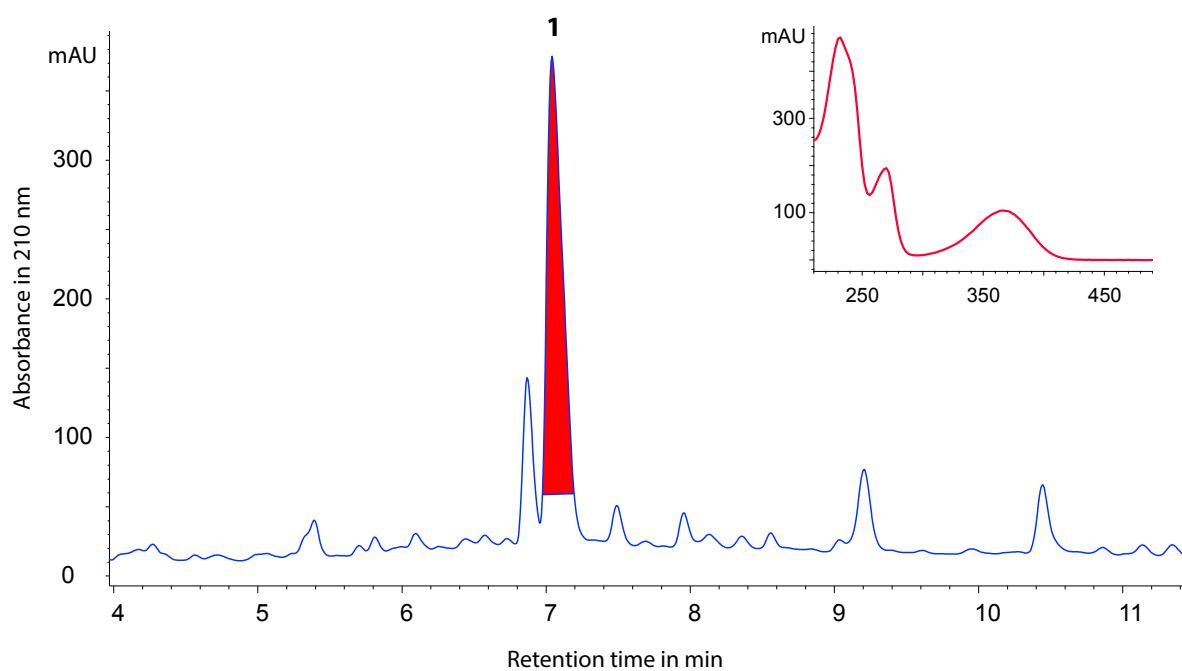

**Figure S4.** Analytical HPLC chromatogram of CMB-01889 *n*-BuOH soluble fraction (inset- UV spectrum of **1**)

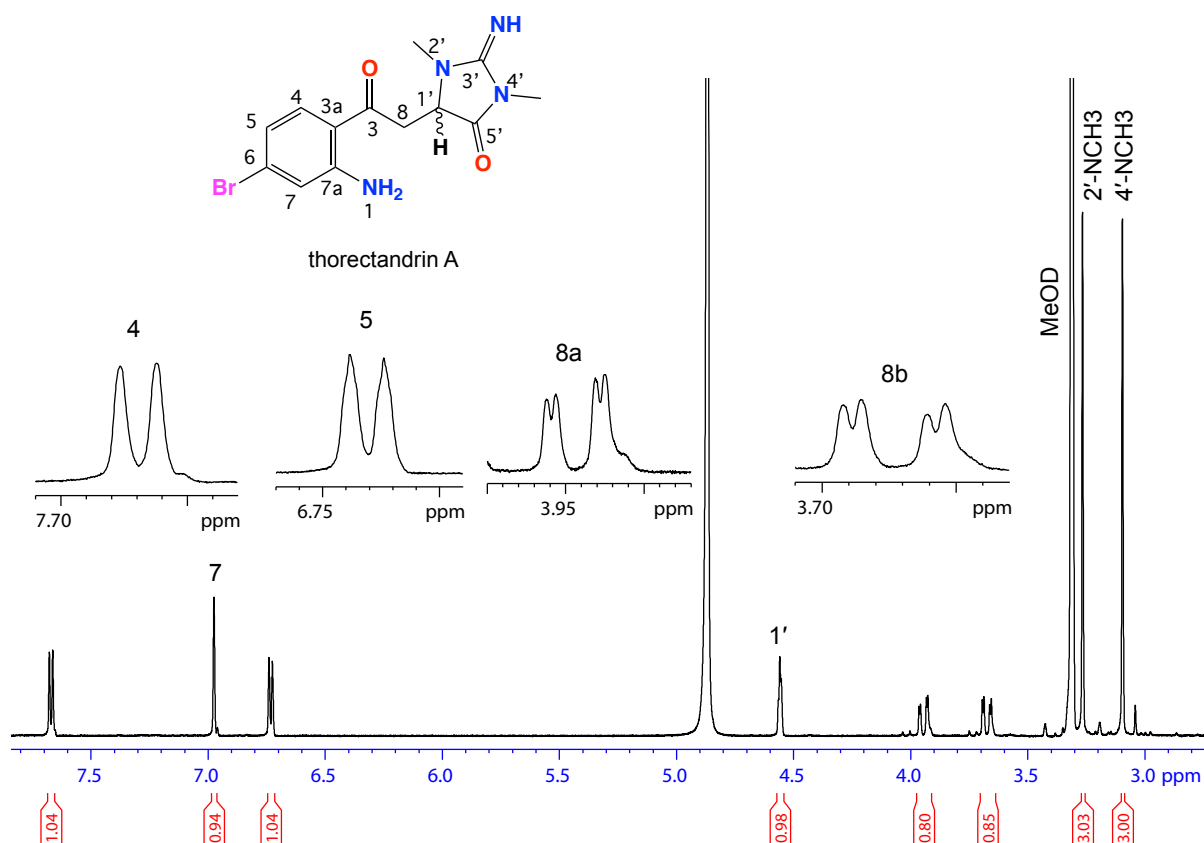

**Figure S5.** <sup>1</sup>H NMR (600 MHz, methanol-*d*<sub>4</sub>) spectrum of thorectandrin A (**1**)

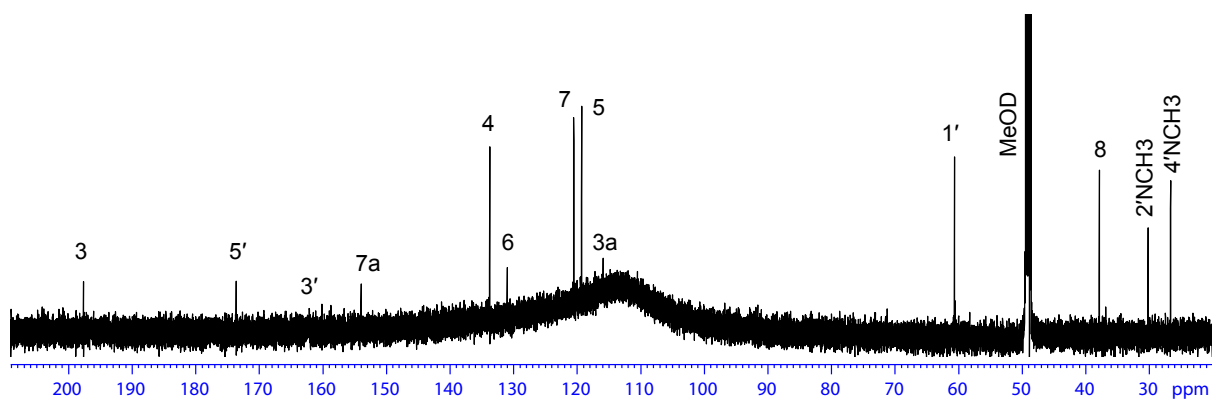

**Figure S6.** <sup>13</sup>C NMR (150 MHz, methanol-*d*<sub>4</sub>) spectrum of thorectandrin A (**1**)

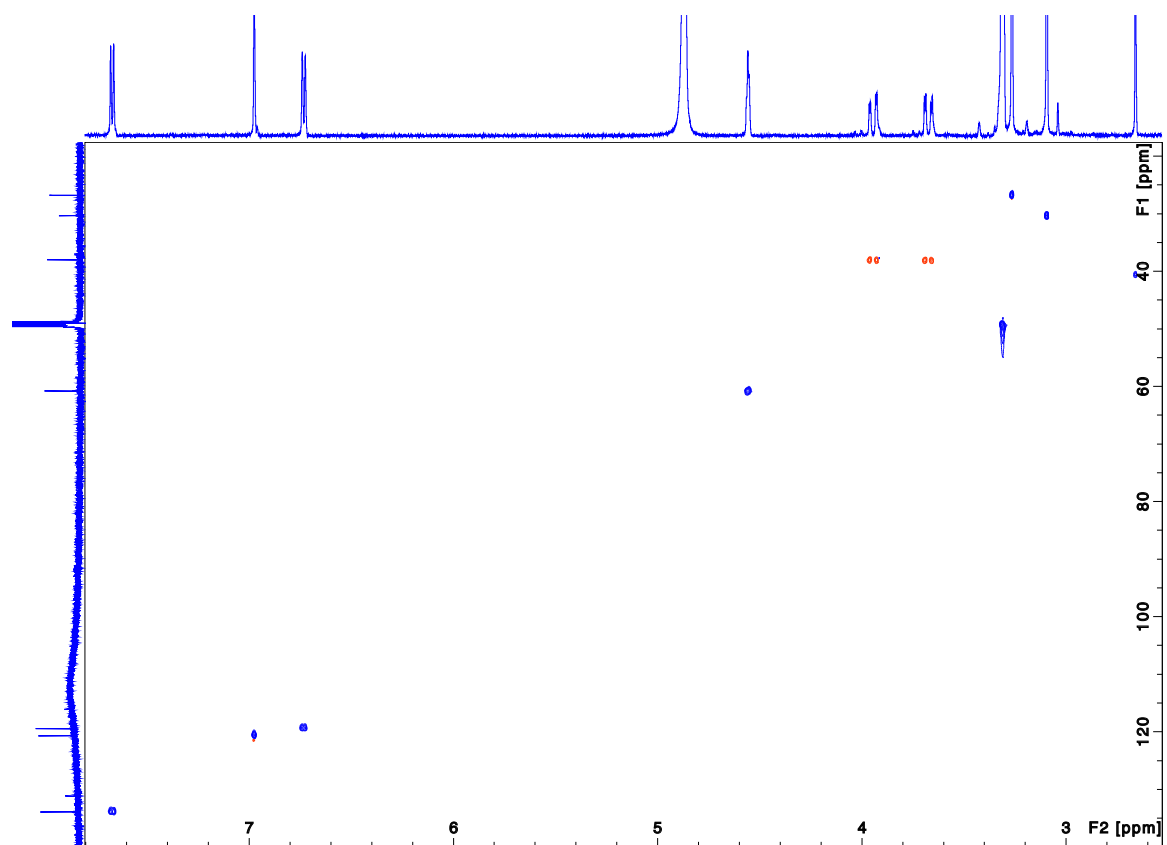

**Figure S7.** HSQC (600 MHz, methanol- $d_4$ ) spectrum of thorectandrin A (**1**)

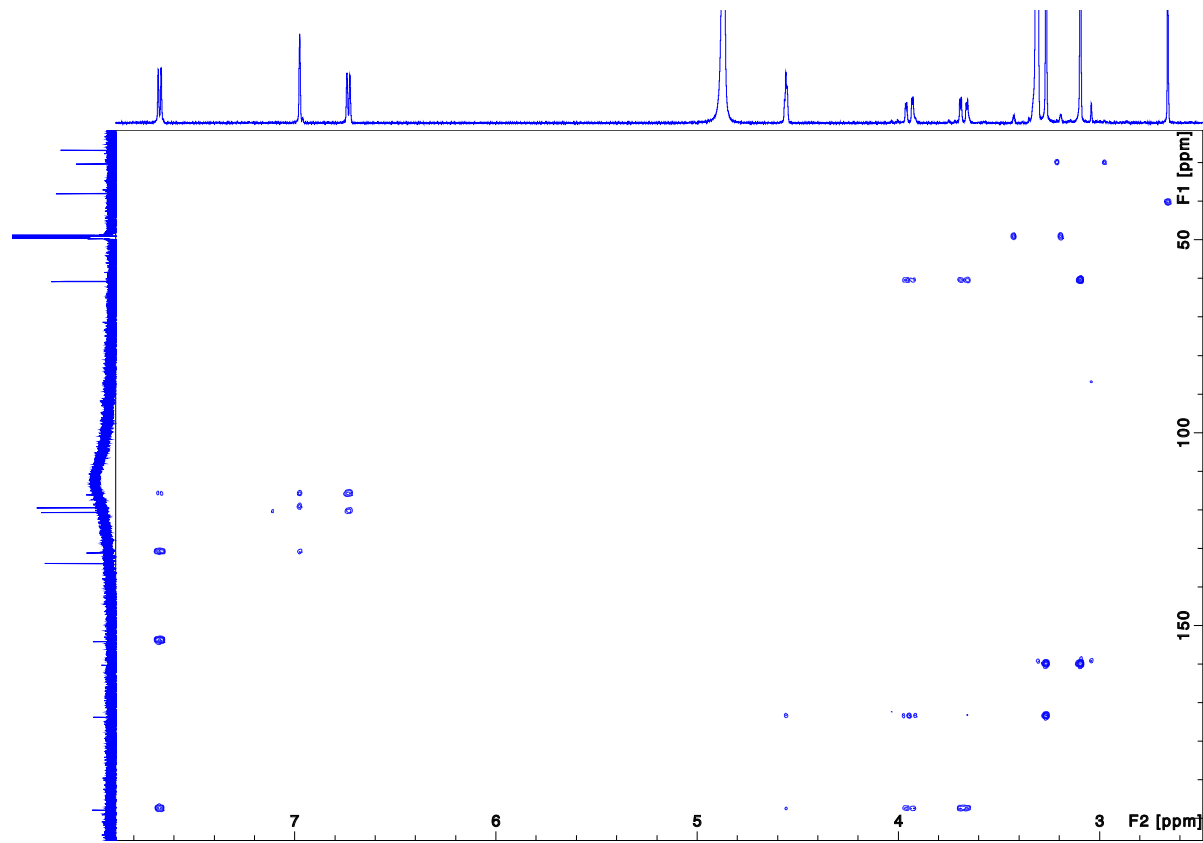

**Figure S8.** HMBC (600 MHz, methanol- $d_4$ ) spectrum of thorectandrin A (**1**)

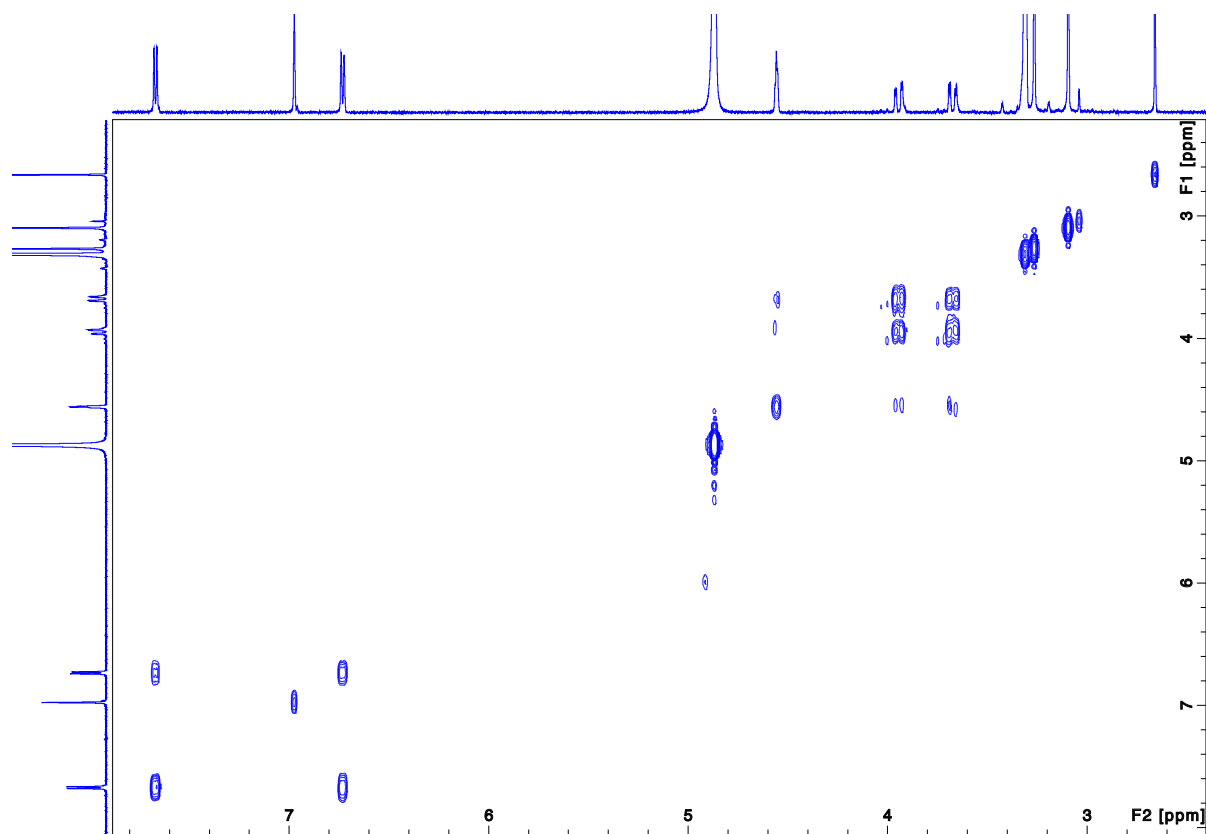

**Figure S9.** COSY (600 MHz, methanol-*d*<sub>4</sub>) spectrum of thorectandrin A (**1**)

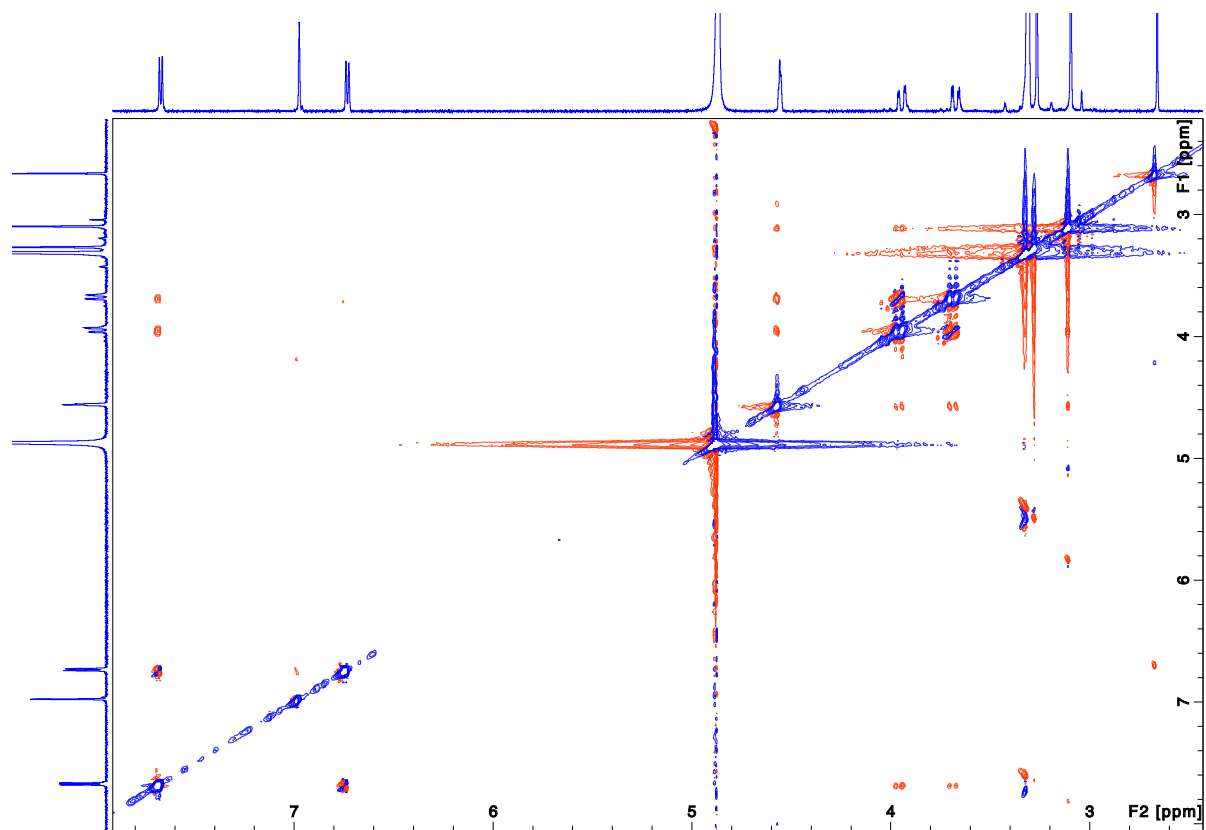

**Figure S10.** ROESY (600 MHz, methanol-*d*<sub>4</sub>) spectrum of thorectandrin A (**1**)



## Mass Spectrum Molecular Formula Report

### Analysis Info

Analysis Name D:\Data\s.khushi\cmb-01889-1-11-14.d  
 Method tune-med\_AP.m  
 Sample Name  
 Comment

Acquisition Date 5/30/2019 12:20:38 PM

Operator a.salim  
 Instrument / Ser# micrOTOF 213750.00  
 232

### Acquisition Parameter

|             |            |                      |          |                  |           |
|-------------|------------|----------------------|----------|------------------|-----------|
| Source Type | ESI        | Ion Polarity         | Positive | Set Nebulizer    | 0.8 Bar   |
| Focus       | Not active |                      |          | Set Dry Heater   | 180 °C    |
| Scan Begin  | 100 m/z    | Set Capillary        | 4500 V   | Set Dry Gas      | 5.0 l/min |
| Scan End    | 1000 m/z   | Set End Plate Offset | -500 V   | Set Divert Valve | Source    |

### Generate Molecular Formula Parameter

|                  |                        |         |
|------------------|------------------------|---------|
| Formula, min.    |                        |         |
| Formula, max.    |                        |         |
| Measured m/z     | Tolerance              | Charge  |
| Check Valence    | Minimum                | Maximum |
| Nitrogen Rule    | Electron Configuration |         |
| Filter H/C Ratio | Minimum                | Maximum |
| Estimate Carbon  |                        |         |

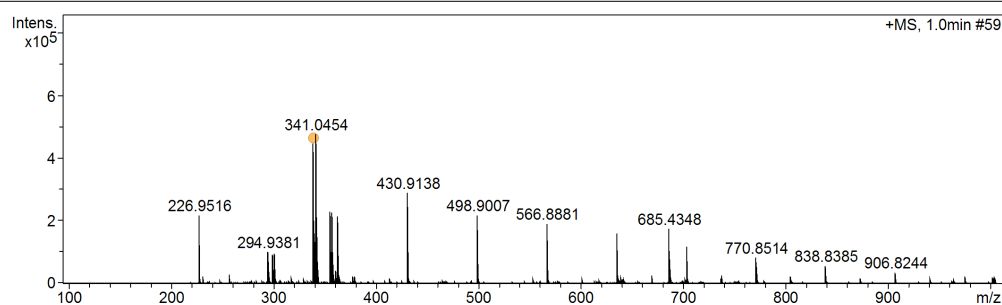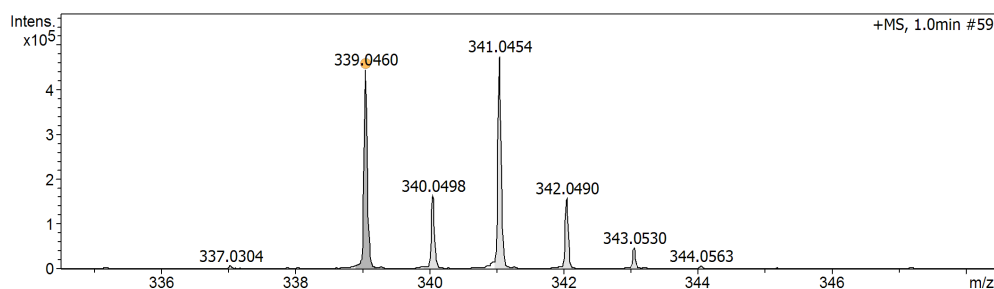

| Meas. m/z | # | Ion Formula                                                     | m/z      | err [ppm] | mSigma | # Sigma | Score  | rdB | e <sup>-</sup> Conf | N-Rule |
|-----------|---|-----------------------------------------------------------------|----------|-----------|--------|---------|--------|-----|---------------------|--------|
| 339.0460  | 1 | C <sub>13</sub> H <sub>16</sub> BrN <sub>4</sub> O <sub>2</sub> | 339.0451 | 2.6       | 124.9  | 1       | 100.00 | 7.5 | even                | ok     |

**Figure S11.** HRESIMS data for thorectandrin A (1)

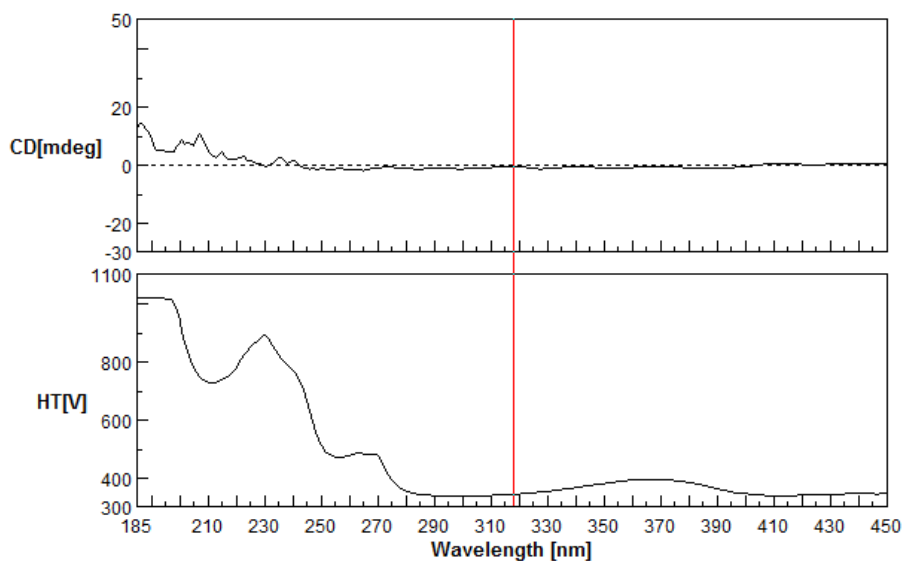

**Figure S12.** ECD (top) and UV (bottom) spectra of thorectandrin A (1)

### Antibacterial assay

The bacterium to be tested was streaked onto a tryptic soy agar plate and incubated at 37 °C for 24 h. One colony was then transferred to fresh tryptic soy broth (15 mL) and the cell density adjusted to  $5\text{--}6 \times 10^5$  CFU/mL. The compounds to be tested were dissolved in DMSO and diluted with H<sub>2</sub>O to return 600 µM stock solutions (20% DMSO). The stock solutions were serially diluted to give concentration range of 600 µM to 0.2 µM in 20% DMSO/H<sub>2</sub>O. An aliquot (10 µL) of each dilution was transferred to a 96-well microtiter plate and freshly prepared microbial broth (190 µL) was added to each well. The plates were incubated at 37 °C for 24 h and the optical density of each well was measured spectrophotometrically at 600 nm using POLARstar Omega plate (BMG LABTECH, Offenburg, Germany). Each test compound was screened against the Gram-negative bacterium *Escherichia coli* (ATCC 11775) and the Gram-positive bacterium *Bacillus subtilis* (ATCC 6051). Rifampicin was used as a positive control (1.2 µM, 40 µg/mL in 10% DMSO). The IC<sub>50</sub> value was calculated as the concentration of the compound or antibiotic required for 50% inhibition of the bacterial cells using Prism 7.0 from GraphPad Software Inc. (La Jolla, CA). All experiments were performed in duplicate.

### Antifungal assay

The fungus to be tested was streaked onto a sabouraud agar plate and incubated at 37 °C for 24 h. One colony was then transferred to fresh sabouraud broth (15 mL) and the cell density adjusted to  $5\text{--}6 \times 10^5$  CFU/mL. The compounds to be tested were dissolved in DMSO and diluted with H<sub>2</sub>O to return 600 µM stock solutions (20% DMSO). The stock solutions were serially diluted to give concentration range of 600 µM to 0.2 µM in 20% DMSO/H<sub>2</sub>O. An aliquot (10 µL) of each dilution was transferred to a 96-well microtiter plate and freshly prepared microbial broth (190 µL) was added to each well to give a final concentration of 30 µM to 0.01 µM per well. The plates were incubated at 37 °C for 24 h and the optical density of each well was measured spectrophotometrically at 600 nm using POLARstar Omega plate (BMG LABTECH, Offenburg, Germany). Each test compound was screened against *Candida albicans* (ATCC 10231). Nystatin was used as a positive control (1.1 µM, 40 µg/mL in 10% DMSO). The IC<sub>50</sub> value was calculated as the concentration of the compound or antibiotic required for 50% inhibition of the bacterial cells using Prism 7.0 from GraphPad Software Inc. (La Jolla, CA). All experiments were performed in duplicate.

### Cytotoxicity assay

Adherent human colorectal (SW620) and lung (NCI-H460) carcinoma cells were cultured in RPMI medium 1640. All cells were cultured as adherent mono layers in flasks supplemented with 10% foetal bovine serum, L-glutamine (2 mM), penicillin (100 unit/mL) and streptomycin (100 µg/mL), in a humidified 37 °C incubator supplied with 5% CO<sub>2</sub>. Briefly, cells were harvested with trypsin and dispensed into 96-well microtiter assay plates at 2,000–5,000 cells/well after which they were incubated for 18 h at 37 °C with 5% CO<sub>2</sub> (to allow cells to attach as adherent mono layers). Test compounds were dissolved in 20% DMSO in PBS (v/v) and aliquots (10 µL) applied to cells over a series of final concentrations ranging from 10 nM to 30 µM. After 48 h incubation at 37 °C with 5% CO<sub>2</sub> an aliquot (20 µL) of MTT in PBS (5 mg/mL) was added to each well (final concentration 0.5 mg/mL), and microtiter plates were incubated for a further 4 h at 37 °C with 5% CO<sub>2</sub>. After final incubation, the medium was aspirated, and precipitated formazan crystals dissolved in DMSO (100 µL/well). The absorbance of each well was measured at 580 nm with a PowerWave XS Microplate Reader from Bio-

Tek Instruments Inc. (Winooski, VT). IC<sub>50</sub> values were calculated using Prism 7.0 (GraphPad Software Inc., La Jolla, CA), as the concentration of analyte required for 50% inhibition of cancer cell growth (compared to negative controls). Negative control comprised of 1% aqueous DMSO, while positive control was doxorubicin. All experiments were performed in duplicate.

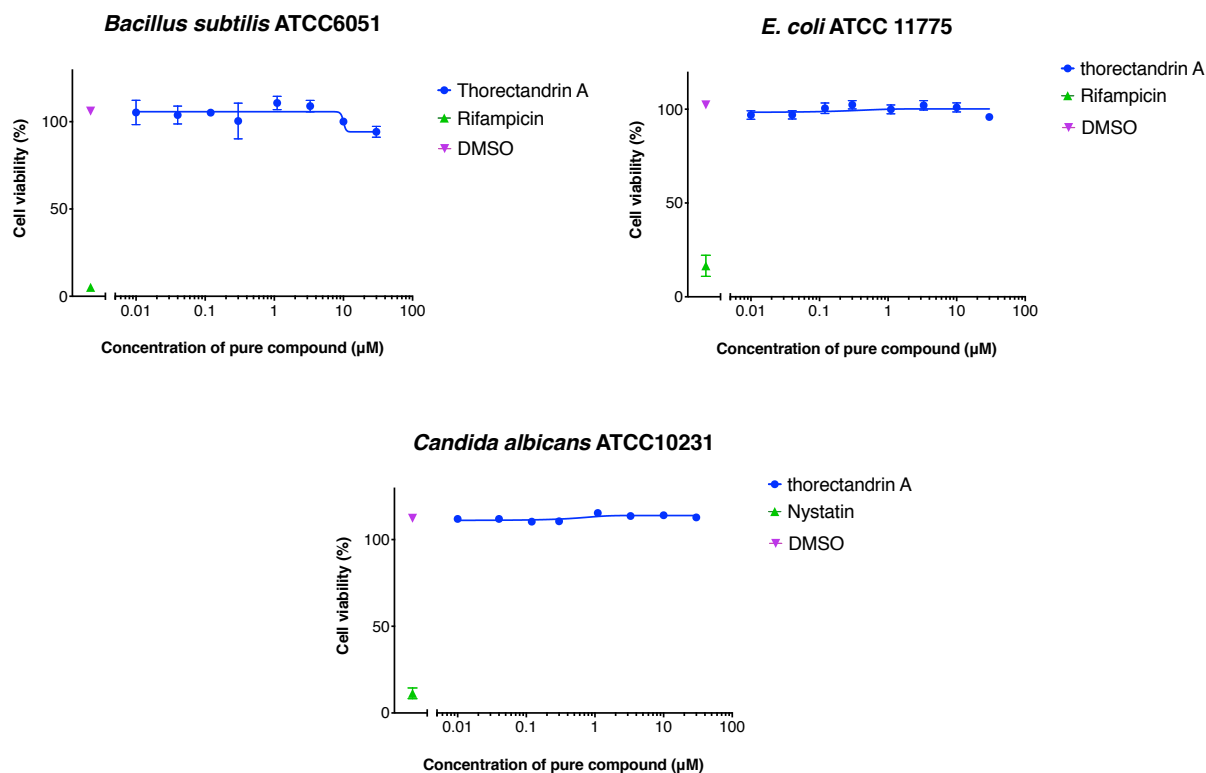

**Figure S13.** Antibacterial and antifungal assay results for thorectandrin A (1)

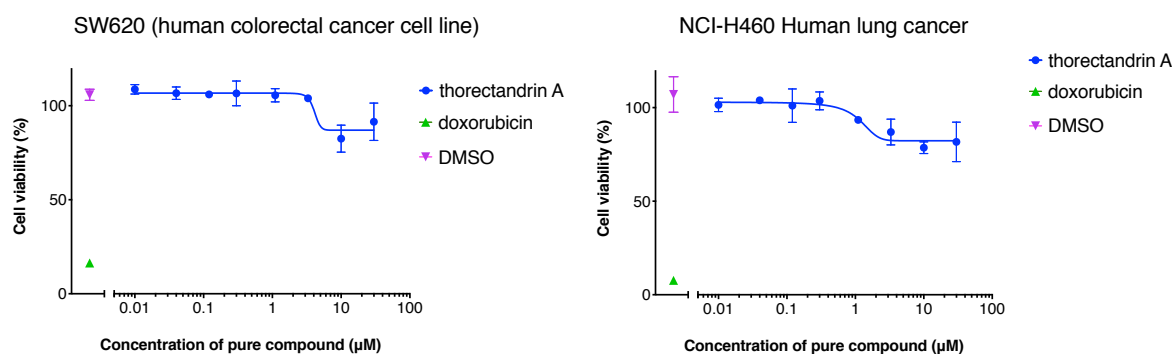

**Figure S14.** Cytotoxicity assay result for thorectandrin A (1)
